# Supplementary material
Source: Springer Nature journal article supplement (https://www.springermedizin.de/resource/supplementary/12877_2011_599_MOESM1_ESM.pdf/9439944)
Supplement: MOESM1 [file 9439944]

## Enrolment

Assessed for eligibility (n=343)

Excluded (n=162)

Not meeting inclusion criteria (n=3)

- dementia (n=3)

Declined to participate (n=159)

- Indecisive (n=30)

- Too demanding (n=76)

- Too medically ill (n=12)

- Satisfied with care (n=22)

- Too healthv. no need of CM (n=19)

Randomized (n=181)

## Allocation

Allocated to intervention (n=89)

Received allocated intervention (n= 87)

Non-eligible due to exclusion criteria  
(did not receive allocated intervention)  
(n=2)

- excluded due to being discharge to sheltered housing (n=1)

Allocated to control (n=92)

Received allocated intervention (n= 90)

Non-eligible due to exclusion criteria  
(n=2)

- discharge to sheltered housing (n=1)

- dementia (n=1)

## Baseline

No baseline data (n=2)

- died before baseline (n=2)

No baseline data (n=14)

- declined participation (n=12)

- died before baseline(n=2)

## Analysis

Analysed (n=85)

Analysed (n= 76)
